# Supplementary material
Source: PubMed Central journal article supplement (PMC2671398)
Supplement: NIHMS86444-supplement-1_si_001.pdf [file NIHMS86444-supplement-1_si_001.pdf]

# Supporting Information: Site-selective glycosylation of hemoglobin on Cys $\beta$ 93

Yalong Zhang<sup>a</sup>, Veer S. Bhatt<sup>b</sup>, Guoyong Sun<sup>c</sup>, Peng G. Wang<sup>a, b</sup> and Andre F. Palmer<sup>c\*</sup>

<sup>a</sup>Department of Chemistry

<sup>b</sup>Biophysics Program and Department of Biochemistry

<sup>c</sup>Department of Chemical and Biomolecular Engineering

The Ohio State University

Columbus, OH, 43210

U.S.A.

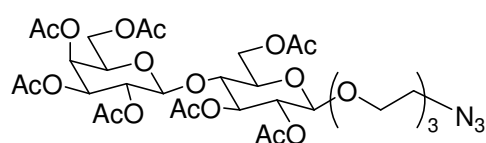

**1-azido-3,6-dioxa-9-octyl-O-(2,3,6-tri-O-acetyl- $\beta$ -D-glucopyranosyl)-(1 $\rightarrow$ 4)-2,3,4,6-tetra-O-acetyl- $\beta$ -D-galactoside (2).** To a solution of peracetyl lactoside **1** (10.0 g, 14.7 mmol) in acetonitrile (150 mL) was added 2-[2-(2-chloroethoxy)ethoxy]ethanol (4.6 mL, 44.2 mmol) and 4 Å MS (Molecular Sieve) (2 g). The mixture was stirred at r.t. for 0.5 h and then cooled to 0 °C. After that, boron trifluoride ether solution (3.9 mL, 29.4 mmol) was injected into the solution. The solution was slowly warmed to room temperature and stirred overnight. The solution was neutralized with saturated NaHCO<sub>3</sub> aqueous solution and extracted with ethyl acetate. The organic phase was dried with Na<sub>2</sub>SO<sub>4</sub>, filtered and concentrated. The crude product was purified by flash column chromatography with Hexanes/ EtOAc (1:1, v/v). The product (5.0 g, 6.35 mmol) in DMF (50 mL) was reacted with sodium azide (1.24 g, 19.1 mmol) and stirred at 80 °C overnight. The DMF was removed under reduced pressure and the crude product was purified by flash column chromatography with Hexanes/ EtOAc (1:1, v/v) to yield **2** (3.2 g) in an overall yield of 30% (two steps) as a colorless oil. <sup>1</sup>H NMR (500 MHz, CDCl<sub>3</sub>)  $\delta$  1.97 (s, 3H), 2.05-2.06 (m, 9H), 2.07 (s, 3H), 2.13 (s, 3H), 2.16 (s, 3H), 3.41 (dd,  $J$  = 9.5, 4.3 Hz, 2H), 3.63-3.71 (m, 9H), 3.71-3.75 (m, 1H), 3.80 (t,  $J$  = 9.6 Hz, 1H), 3.86-3.93 (m, 2H), 4.07-4.16 (m, 3H), 4.48-4.51 (m, 2H), 4.58 (d,  $J$  = 8.0 Hz, 1H), 4.90 (dd,  $J$  = 9.5, 8.0 Hz, 1H), 4.96 (dd,  $J$  = 10.4, 3.5 Hz, 1H), 5.11 (dd,  $J$  = 10.5, 8.0 Hz, 1H), 5.20 (t,  $J$  = 9.4 Hz, 1H), 5.35-5.36

(m, 1H).  $^{13}\text{C}$  NMR (125 MHz,  $\text{CDCl}_3$ )  $\delta$  20.49, 20.61, 20.69, 20.80, 20.85, 50.69, 60.81, 62.02, 66.63, 69.05, 69.14, 70.05, 70.40, 71.00, 71.69, 72.65, 72.84, 76.29, 100.64, 101.08, 169.07, 169.65, 169.76, 170.05, 170.14, 170.34, 170.36.

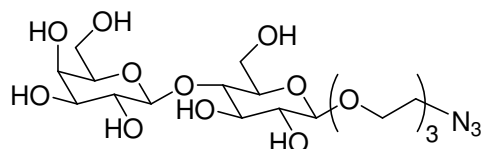

**1-azido-3,6-dioxa-9'-octyl-O-( $\beta$ -D-glucopyranosyl)-(1 $\rightarrow$ 4)- $\beta$ -D-galactoside (3).** To a solution of compound **2** (3.3 g, 4.16 mmol) in MeOH (20 ml) was added sodium methoxide (22.5 mg, 0.416 mmol). The mixture was stirred at r.t. for 5 h, and neutralized with Dowex 50WX2-100 ( $\text{H}^+$ ) resin. The resultant solution was then concentrated under reduced pressure to yield **3** (1.7 g, 82%) as a white solid.  $^1\text{H}$  NMR (500 MHz,  $\text{D}_2\text{O}$ )  $\delta$  3.23-3.26 (m, 1H), 3.41 (t,  $J = 5.2$  Hz, 2H), 3.44-3.46 (m, 1H), 3.48-3.51 (m, 1H), 3.55-3.57 (m, 3H), 3.61-3.63 (m, 7H), 3.65-3.67 (m, 4H), 3.69-3.77 (m, 2H), 3.82 (d,  $J = 3.3$  Hz, 1H), 3.87-3.89 (m, 1H), 3.94-3.99 (m, 1H), 4.34 (d,  $J = 7.9$  Hz, 1H), 4.42 (d,  $J = 8.0$  Hz, 1H).  $^{13}\text{C}$  NMR (125 MHz,  $\text{CDCl}_3$ )  $\delta$  50.09, 60.03, 60.98, 68.71, 69.17, 69.45, 69.55, 69.65, 70.91, 72.48, 72.78, 74.26, 74.73, 75.31, 78.31, 102.04, 102.90.

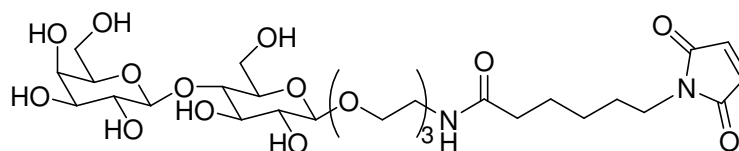

***N*-3',6'-dioxa-9'-octyl-O-( $\beta$ -D-glucopyranosyl)-(1 $\rightarrow$ 4)- $\beta$ -D-galactoside-6-maleimido-hexanamide (maleimide-lactoside) (4).** To a solution of compound **3** (0.20 g, 0.40 mmol) in MeOH (10 mL) was added a catalytic amount of Pd/C. The mixture was stirred under hydrogen atmosphere at r.t. for 24 h. Consequently, the Pd/C was removed by filtration and the solution was concentrated under reduced pressure to yield the amine compound. The amine compound (50 mg, 0.106 mmol) in DMF (5.0 mL) was reacted with 6-maleimidohexanoic acid *N*-hydroxysuccinimide ester (34.0 mg, 0.111 mmol) and  $\text{Et}_3\text{N}$  (21  $\mu\text{L}$ , 0.148 mmol). The solution was stirred at 40  $^\circ\text{C}$  overnight. The solvent was removed under reduced pressure and the residue was purified by flash chromatography with EtOAc:IPA: $\text{H}_2\text{O}$  (6:3:1) to yield the

product as a colorless oil (26.1 mg) with an overall total yield of 37% (two steps). <sup>1</sup>H NMR (500 MHz, MeOD) δ 1.30-1.34 (m, 2H), 1.59-1.66 (m, 4H), 2.21 (t, *J* = 7.4 Hz, 2H), 3.29 (t, *J* = 8.3 Hz, 1H), 3.32-3.34 (m, 4H), 3.36-3.38 (m, 2H), 3.43-3.46 (m, 1H), 3.50-3.53 (m, 3H), 3.54-3.57 (m, 4H), 3.59-3.64 (m, 4H), 3.68-3.74 (m, 5H), 3.75-3.82 (m, 2H), 3.84-3.87 (m, 2H), 3.92 (dd, *J* = 12.2, 2.6 Hz, 1H), 4.01-4.05 (m, 1H), 4.38 (d, *J* = 7.6, 5.6 Hz, 2H), 6.83 (s, 2H). <sup>13</sup>C NMR (125 MHz, MeOD) δ 25.05, 25.92, 27.88, 35.41, 37.04, 38.92, 60.58, 61.09, 68.30, 68.90, 69.24, 69.80, 70.08, 70.14, 71.16, 73.34, 73.44, 74.90, 75.12, 75.69, 79.31, 102.90, 103.73, 133.98, 171.23, 174.73. HRMS: Calculated for C<sub>28</sub>H<sub>46</sub>N<sub>2</sub>O<sub>16</sub>Na (M+Na<sup>+</sup>) 689.2745; found 689.2744.

The proteolytic MS-MS data of the βChain of the glycosylated bovine hemoglobin

Trypsin

| Measured m/z                                | Calculate<br>d M+H | Theoretica<br>l M+H | Protein Sequence                                                  | MASCO<br>T Score | # Being<br>detecte<br>d |
|---------------------------------------------|--------------------|---------------------|-------------------------------------------------------------------|------------------|-------------------------|
| 821.36 <sup>1+</sup> /411.24 <sup>2+</sup>  | 821.48             | 821.4073            | <sup>1</sup> MLTAE EK <sup>7</sup>                                | 490              | 19                      |
| 837.53 <sup>1+</sup> /419.31 <sup>2+</sup>  | 837.62             | 837.4022            | <sup>1</sup> M <sub>(Ox)</sub> LTAE EK <sup>7</sup>               | 82               | 3                       |
| 950.38 <sup>1+</sup> /475.80 <sup>2+</sup>  | 950.60             | 950.5094            | <sup>8</sup> AAVTAFWGK <sup>16</sup>                              | 1415             | 30                      |
| 584.98 <sup>3+</sup>                        | 1752.94            | 1752.8989           | <sup>1</sup> MLTAE EKAAVTAFWGK <sup>16</sup>                      | 481              | 12                      |
| 1328.82 <sup>1+</sup> /664.87 <sup>2+</sup> |                    |                     |                                                                   |                  |                         |
| +                                           | 1328.74            | 1328.7169           | <sup>17</sup> VKVDEVGGEALGR <sup>29</sup>                         | 2542             | 47                      |
| 551.30 <sup>2+</sup>                        | 1101.60            | 1101.5535           | <sup>19</sup> VDEVGGEALGR <sup>29</sup>                           | 229              | 6                       |
| 425.56 <sup>3+</sup> /637.83 <sup>2+</sup>  | 1274.66            | 1274.7256           | <sup>30</sup> LLVVYPWTQR <sup>39</sup>                            | 955              | 24                      |
| 697.19 <sup>3+</sup>                        | 2089.57            | 2089.9535           | <sup>40</sup> FFESFGDLSTADAVMNNPK <sup>58</sup>                   | 3403             | 45                      |
| 702.71 <sup>3+</sup> /1053.70 <sup>2+</sup> |                    |                     |                                                                   |                  |                         |
| +                                           | 2106.13            | 2104.9484           | <sup>40</sup> FFESFGDLSTADAVM <sub>(Ox)</sub> NNPK <sup>58</sup>  | 881              | 14                      |
| 613.32 <sup>2+</sup>                        | 1225.64            | 1225.6245           | <sup>65</sup> KVLDSFSNGMK <sup>75</sup>                           | 272              | 9                       |
| 549.17 <sup>2+</sup>                        | 1097.34            | 1097.5296           | <sup>66</sup> VLDSFSNGMK <sup>75</sup>                            | 602              | 18                      |
| 557.34 <sup>2+</sup>                        | 1113.68            | 1113.5245           | <sup>66</sup> VLDSFSNGM <sub>(Ox)</sub> K <sup>75</sup>           | 35               | 1                       |
| 724.14 <sup>3+</sup> /1085.65 <sup>2+</sup> |                    |                     |                                                                   |                  |                         |
| +                                           | 2170.30            | 2170.0597           | <sup>76</sup> HLDDLKGTFAALSELHC <sub>(Cam)</sub> DK <sup>94</sup> | 287              | 4                       |
|                                             |                    |                     | <sup>82</sup> GTFAALSELHC <sub>(Cam)</sub> DKLHVPENFK             |                  |                         |
| 843.66 <sup>3+</sup>                        | 2528.98            | 2528.2238           | <sup>103</sup>                                                    | 75               | 2                       |
| 782.76 <sup>3+</sup>                        | 2346.28            | 2345.3704           | <sup>95</sup> LHVPENFKLLGNVLLVVLAR <sup>115</sup>                 | 89               | 2                       |
| 422.55 <sup>3+</sup> /633.70 <sup>2+</sup>  | 1265.40            | 1265.8304           | <sup>104</sup> LLGNVLLVVLAR <sup>115</sup>                        | 1039             | 22                      |
| 935.10 <sup>3+</sup> /623.63 <sup>3+</sup>  | 1868.89            | 1868.9541           | <sup>116</sup> NFGKEFTPVLQADFQK <sup>131</sup>                    | 1416             | 36                      |
| 474.80 <sup>3+</sup> /711.88 <sup>2+</sup>  | 1422.76            | 1422.7264           | <sup>120</sup> EFTPVLQADFQK <sup>131</sup>                        | 1029             | 21                      |
| 589.36 <sup>2+</sup>                        | 1177.72            | 1177.6800           | <sup>132</sup> VVAGVANALAH R <sup>143</sup>                       | 1396             | 18                      |

## Chymotrypsin

| Measured m/z                                | Calculate |           | Theoretica<br>I M+H | Protein Sequence                                                  | MASCO      |                     |
|---------------------------------------------|-----------|-----------|---------------------|-------------------------------------------------------------------|------------|---------------------|
|                                             | d M+H     | M+H       |                     |                                                                   | T<br>Score | # Being<br>detected |
| 691.42 <sup>2+</sup>                        | 1381.39   | 1381.7032 |                     | <sup>1</sup> MLTAEKAAVTAF <sup>13</sup>                           | 143        | 4                   |
| 784.42 <sup>2+</sup>                        | 1567.84   | 1567.7825 |                     | <sup>1</sup> MLTAEKAAVTAFW <sup>14</sup>                          | 110        | 3                   |
| 570.02 <sup>2+</sup>                        | 1139.08   | 1137.5786 |                     | <sup>3</sup> TAEKAAVTAF <sup>13</sup>                             | 27         | 1                   |
| 663.13 <sup>2+</sup>                        | 1325.26   | 1323.6579 |                     | <sup>3</sup> TAEKAAVTAFW <sup>14</sup>                            | 21         | 1                   |
| 642.66 <sup>3+</sup>                        | 1925.98   | 1926.0807 |                     | <sup>14</sup> WGKVKVDEVGGEALGRLL <sup>31</sup>                    | 113        | 2                   |
| 651.11 <sup>2+</sup>                        | 1301.22   | 1300.7101 |                     | <sup>15</sup> GKVKVDEVGGEAL <sup>27</sup>                         | 73         | 2                   |
| 580.73 <sup>3+</sup> /870.77 <sup>2+</sup>  | 1740.54   | 1740.0014 |                     | <sup>15</sup> GKVKVDEVGGEALGRLL <sup>31</sup>                     | 344        | 6                   |
| 663.37 <sup>1+</sup>                        | 663.37    | 663.3501  |                     | <sup>32</sup> VVYPW <sup>36</sup>                                 | 195        | 8                   |
| 531.29 <sup>2+</sup>                        | 1061.58   | 1061.5051 |                     | <sup>37</sup> TQRFFESF <sup>44</sup>                              | 22         | 1                   |
| 674.00 <sup>2+</sup>                        | 1347.00   | 1346.6375 |                     | <sup>37</sup> TQRFFESFGDL <sup>47</sup>                           | 40         | 1                   |
| 782.32 <sup>3+</sup> /521.48 <sup>3+</sup>  | 1562.44   | 1562.7632 |                     | <sup>71</sup> SNGMKHLDDLKGTG <sup>84</sup>                        | 243        | 9                   |
| 527.05 <sup>3+</sup>                        | 1579.15   | 1578.7581 |                     | <sup>71</sup> SNGM <sub>(ox)</sub> KHLDDLKGTG <sup>84</sup>       | 25         | 1                   |
| 603.28 <sup>1+</sup>                        | 603.28    | 603.3348  |                     | <sup>85</sup> AALSEL <sup>90</sup>                                | 42         | 2                   |
| 418.98 <sup>3+</sup> /628.81 <sup>2+</sup>  | 1256.62   | 1256.6303 |                     | <sup>85</sup> AALSELHC <sub>(Cam)</sub> DKL <sup>95</sup>         | 64         | 2                   |
| 699.52 <sup>3+</sup> /1048.20 <sup>2+</sup> |           |           |                     | <sup>85</sup> AALSELHC <sub>(Cam)</sub> DKLHVDPENF <sup>102</sup> |            |                     |
| +                                           | 2095.40   | 2094.9913 |                     |                                                                   | 82         | 2                   |
| 756.600 <sup>2+</sup>                       | 1512.20   | 1510.6743 |                     | <sup>91</sup> HC <sub>(Cam)</sub> DKLHVDPENF <sup>102</sup>       | 48         | 1                   |
| 614.30 <sup>3+</sup>                        | 1840.90   | 1839.9388 |                     | <sup>114</sup> ARNFGKEFTPVLQADF <sup>129</sup>                    | 25         | 1                   |
| 676.36 <sup>2+</sup>                        | 1351.72   | 1351.6892 |                     | <sup>118</sup> GKEFTPVLQADF <sup>129</sup>                        | 376        | 9                   |
| 801.50 <sup>3+</sup> /1202.18 <sup>2+</sup> |           |           |                     | <sup>118</sup> GKEFTPVLQADFQKVVAGVANAL <sup>1</sup>               |            |                     |
| +                                           | 2402.50   | 2402.3078 |                     | <sup>40</sup>                                                     | 87         | 2                   |
| 971.04 <sup>2+</sup>                        | 1941.08   | 1941.0804 |                     | <sup>122</sup> TPVLQADFQKVVAGVANAL <sup>140</sup>                 | 180        | 4                   |
| 766.06 <sup>2+</sup>                        | 1531.12   | 1530.8275 |                     | <sup>126</sup> QADFQKVVAGVANAL <sup>140</sup>                     | 50         | 1                   |
| 535.40 <sup>2+</sup>                        | 1069.80   | 1069.6364 |                     | <sup>130</sup> QKVVAGVANAL <sup>140</sup>                         | 95         | 3                   |

**Table 1. Data-collection statistics.**

Values in parentheses are for the last shell.

|                                          |                                               |
|------------------------------------------|-----------------------------------------------|
| Wavelength (Å)                           | 1.54                                          |
| Space group                              | P2 <sub>1</sub> 2 <sub>1</sub> 2 <sub>1</sub> |
| Unit-cell parameters (Å)                 | $a = 62.6, b = 74.0, c = 129.8$               |
| $V_M$ (Å <sup>3</sup> Da <sup>-1</sup> ) | 2.35                                          |
| Solvent content (%)                      | 47.7                                          |
| Resolution range (Å)                     | 24.5 - 3.5 (3.6 - 3.5)                        |
| No. of observed reflections              | 23286                                         |
| No. of unique reflections                | 7999                                          |
| Completeness (%)                         | 96.4 (92.5)                                   |
| $R_{\text{sym}}$ (%)                     | 13.1 (33.2)                                   |
| $I/I_G$                                  | 5.3 (2.4)                                     |

**Table 2. Summary of crystallographic refinement.**

|                                                     | PDB code              |
|-----------------------------------------------------|-----------------------|
| Resolution limits (Å)                               | 24.5 - 3.5            |
| R <sub>cryst</sub> (%)                              | 26.8                  |
| R <sub>free</sub> (%)                               | 33.2                  |
| Total number of non-hydrogen atoms                  | 4582                  |
| Total number of atoms in succinimide linked lactose | 1(44)                 |
| Water molecules                                     | 8                     |
|                                                     | R.m.s. deviations†(Å) |
| Bond lengths                                        | 0.006                 |
| Bond angles                                         | 0.98                  |
| Dihedral angles                                     | 0.05                  |
| Overall G factor <sup>§</sup>                       | 0.26                  |
| Average B factors (Å) <sup>2</sup>                  | 91.2                  |
| Residues in most favored regions (%)                | 91.1                  |
| Residues in additionally allowed regions (%)        | 8.9                   |

†Target stereochemistry from literature<sup>62</sup>    § As reported by PROCHECK<sup>63</sup>

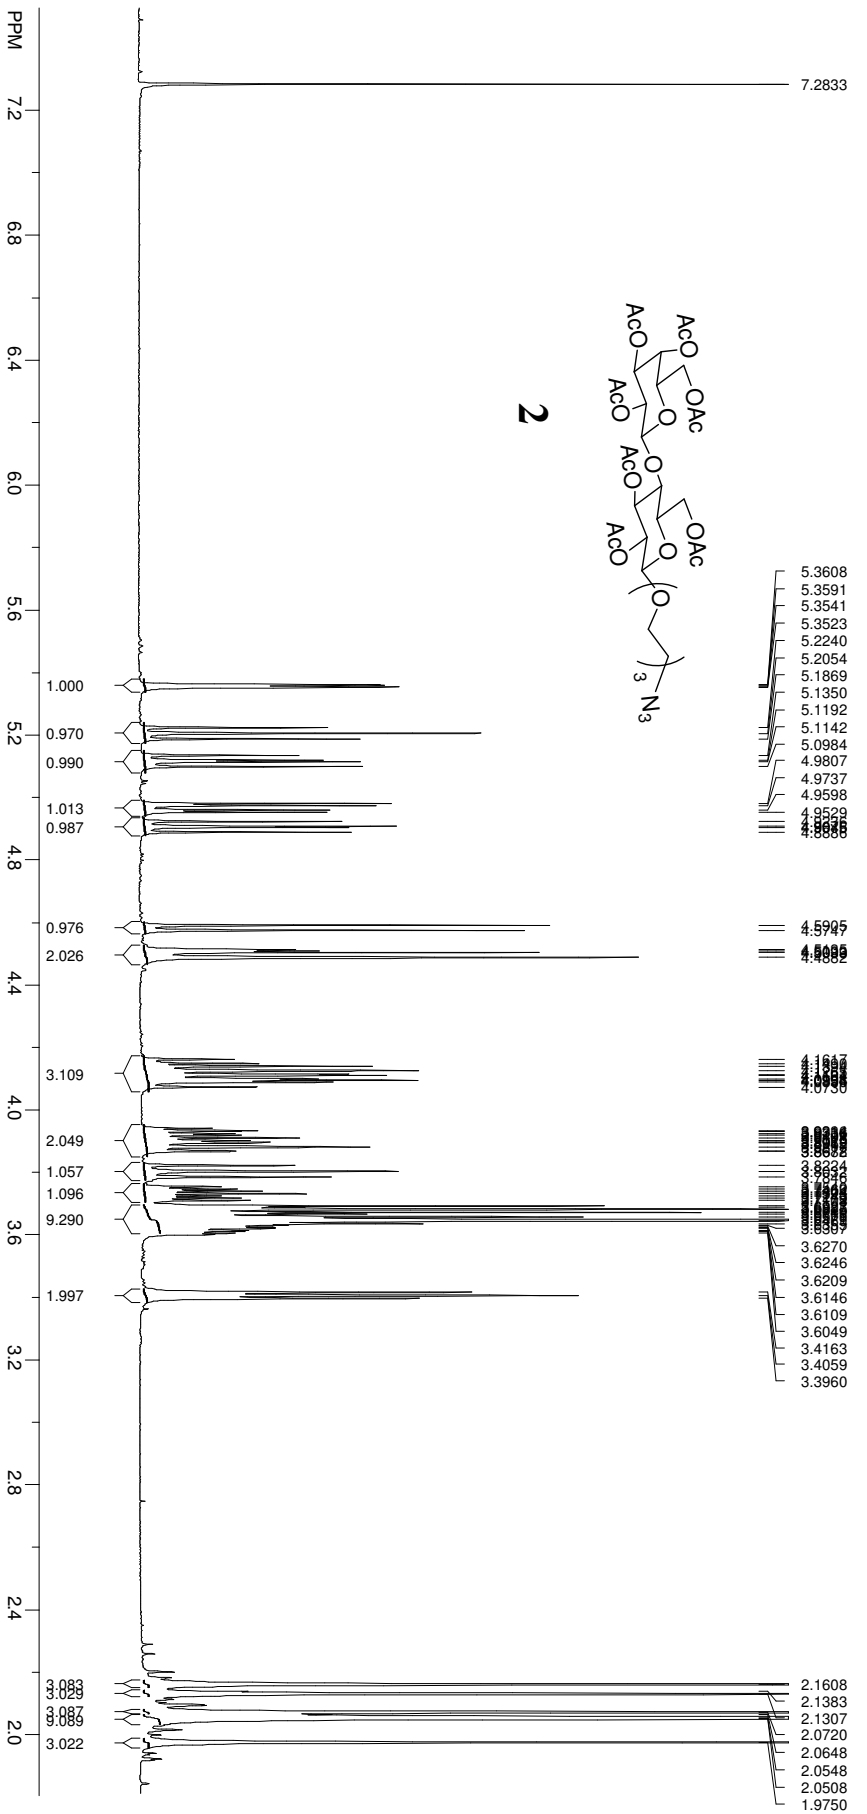

20.8482  
20.8032  
20.6889  
20.6145  
20.4913

50.6898  
60.8072  
62.0244  
66.6295  
69.0459  
69.1384  
70.0512  
70.3977  
70.6990  
70.7195  
71.0033  
71.6859  
72.6512  
72.8364  
76.2857  
76.7775  
76.9482  
77.0320  
77.1574  
77.2864

101.0843  
100.6351

170.3633  
170.3380  
170.1352  
170.0471  
169.7629  
169.6467  
169.0702

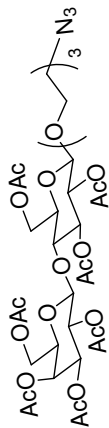

2

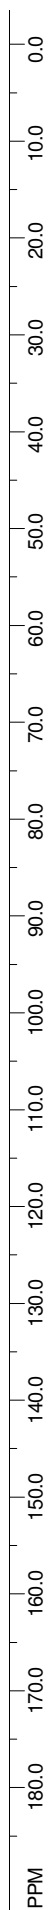

freq. of 0 ppm: 125.730725 MHz  
processed size: 32768 complex:points  
LB: 1.000 GB: 0.0000

file: E:\Lab works\NMR\mr\linker\peracetyl LacPEG3\3\azide-8-11\2fid exp: <zggg30>  
transmitter freq.: 125.742702 MHz  
time domain size: 65536 points  
width: 30030.03 Hz = 238.821256 ppm = 0.458222 Hz/pt  
number of scans: 897



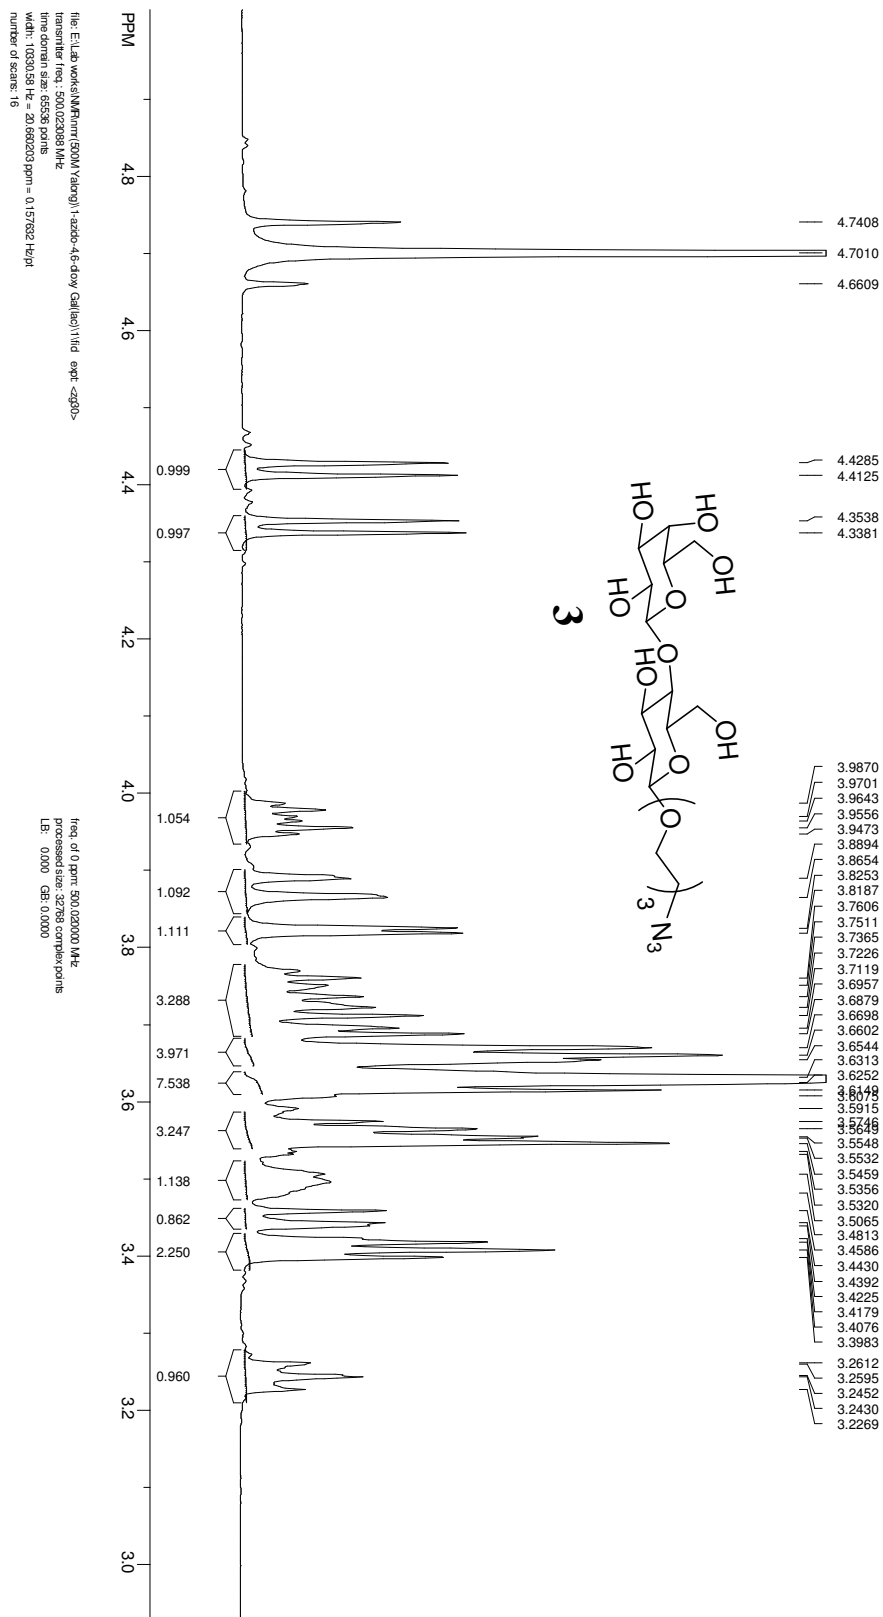

102.8999  
102.0408  
78.3071  
75.3136  
74.7273  
74.2624  
72.7745  
72.4760  
70.9093  
69.6501  
69.5464  
69.4511  
69.1674  
68.7051  
68.5033  
60.9819  
60.0266  
50.0842

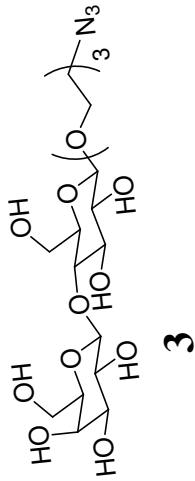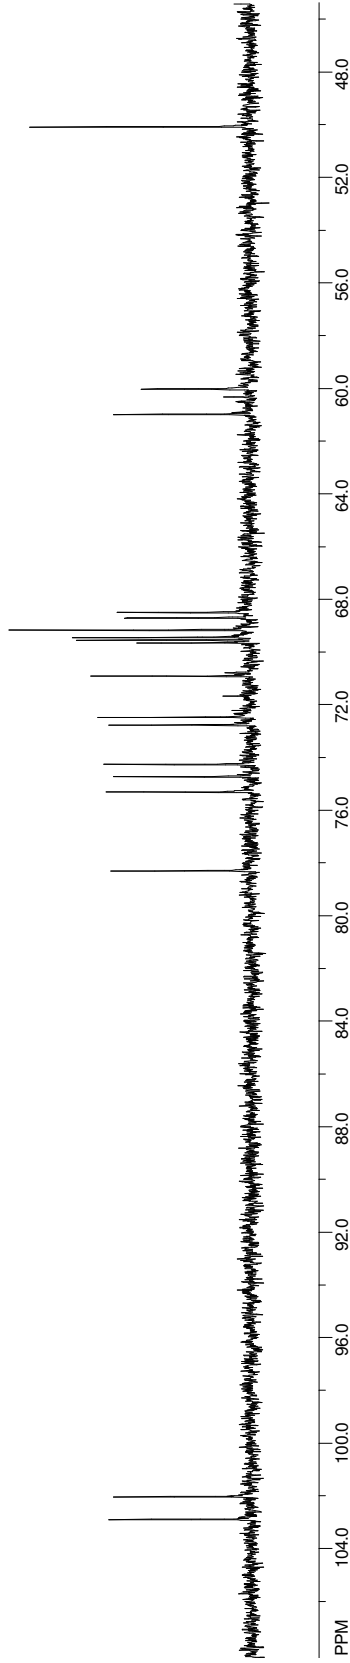

file: E:\Lab works\NMR\500M Yalorg\1-azido-4,6-dioxo-2,3,5-trihydroxy-D-galactopyranose-3  
 transmitter freq: 125.742702 MHz  
 time domain size: 65536 points  
 width: 30030.03 Hz = 238.821256 ppm = 0.458222 Hz/pt  
 number of scans: 668  
 freq. of 0 ppm: 125.730125 MHz  
 processed size: 32788 complex points  
 LB: 0.000 GB: 0.0000

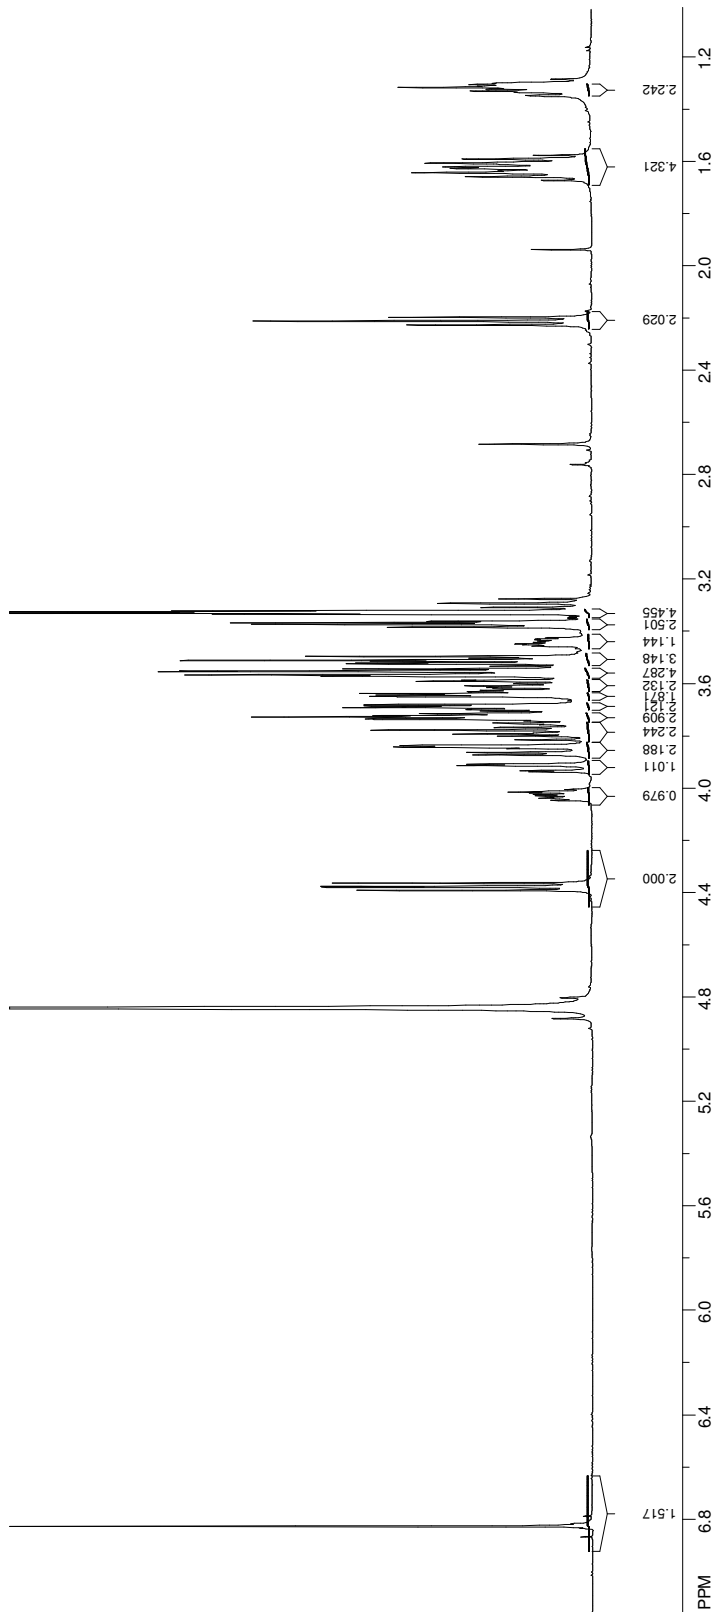

file: E:\Lab works\NMR\500M\Yabong\LacPE3\2\6\luc1\1\ld exp: -sg6b-  
 transmitter freq.: 500.02388 MHz  
 time domain size: 65536 points  
 width: 10300.361 Hz = 20.60070 ppm = 0.157632 Hz/ppm  
 number of scans: 16

freq of 0 ppm: 500.020000 MHz  
 processed size: 32768 complex points  
 LB: 0.000 GB: 0.0000

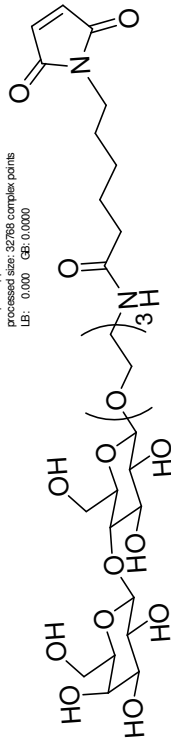

4
